# Supplementary material for: An unprecedented double-bridging interpenetrating α-Po network based on a new heterometallic cluster {Cu4Mo6}
Source: Royal Society of Chemistry journal article supplement (doi:10.1039/c0dt00860e), 2010-11-09
Supplement: c0dt00860e.pdf [file c0dt00860e.pdf]

## Unprecedented double-bridging interpenetrating $\alpha$ -Po network based on a new heterometallic cluster $\{\text{Cu}_4\text{Mo}_6\}$

Zuo-Xi Li,<sup>a,b</sup> Hong Ma,<sup>a</sup> Shao-Long Chen,<sup>a</sup> Zhong-Da Pan,<sup>a</sup> Yong-Fei Zeng,<sup>a</sup> Xiu-Li Wang<sup>c</sup> and Xian-He Bu<sup>\*a</sup>

<sup>a</sup>Department of Chemistry, and TKL of Metal- and Molecule-Based Material Chemistry, Nankai University, Tianjin 300071, China. Fax: 86 22 2350-2458; E-mail: buxh@nankai.edu.cn

<sup>b</sup>Key Laboratory of Synthetic and Natural Functional Molecule Chemistry of the Ministry of Education, Shanxi Key Laboratory of Physico-Inorganic Chemistry, College of Chemistry & Materials Science, Northwest University, Xi'an 710069, China

<sup>c</sup>Faculty of Chemistry and Chemical Engineering, Bohai University, Jinzhou 121000, P.R. China

### Single-crystal X-ray diffraction

X-ray single-crystal diffraction data was collected on a Rigaku R-axis rapid IP area detector with graphite monochromatic Mo-K $\alpha$  radiation ( $\lambda = 0.71073 \text{ \AA}$ ). The program SAINT<sup>1</sup> was used for integration of the diffraction profiles. The crystal structure was solved by direct methods using the SHELXS program of the SHELXTL package and refined by full-matrix least-squares methods with SHELXL<sup>2</sup>. Metal atoms were located from the *E*-maps and other non-hydrogen atoms were located in successive difference Fourier syntheses and refined with anisotropic thermal parameters on *F*<sup>2</sup>. Hydrogen atoms were generated theoretically onto the specific atoms and refined isotropically with fixed thermal factors.

### References

- (1) Bruker AXS, *SAINT Software Reference Manual*, Madison, WI, **1998**.
- (2) Sheldrick, G. M. *SHELXTL NT Version 5.1. Program for Solution and Refinement of Crystal Structures*, University of Göttingen, Germany, **1997**.

## **Electrochemical experiment**

The electrochemical analysis was carried out using a CHI 440 Electrochemical Quartz Crystal Microbalance. A conventional three-electrode cell was used at room temperature. The modified electrode was used as working electrode. A SCE and a platinum wire were used as reference and auxiliary electrodes, respectively. The complex modified carbon paste electrode (**1-CPE**) was fabricated as follows: 0.5 g graphite powder and 0.03 g complex was mixed and ground together by agate mortar and pestle for approximately 30 min to achieve an even, dry mixture; to the mixture 0.2 ml paraffin oil was added and stirred with a glass rod; then the homogenized mixture was used to pack 3 mm inner diameter glass tube to a length of 0.8 cm. The electrical contact was established with the copper stick, and the surface of the modified CPE was wiped with weighing paper.

**Table 1.** Selected bond lengths [Å] and angles [°] for compound **1**

---

|                      |            |                     |            |
|----------------------|------------|---------------------|------------|
| Cu(1)-O(11)          | 1.959(4)   | Cu(1)-O(3)          | 1.959(4)   |
| Cu(1)-N(3)           | 2.005(5)   | Cu(1)-N(10)#1       | 2.040(5)   |
| Cu(1)-N(1)           | 2.286(5)   | Cu(2)-O(4)          | 1.948(4)   |
| Cu(2)-N(7)           | 1.977(5)   | Cu(2)-O(10)#2       | 2.009(4)   |
| Cu(2)-O(2)           | 2.013(4)   | Cu(2)-N(6)#3        | 2.216(5)   |
| Mo(1)-O(1)           | 1.700(4)   | Mo(1)-O(3)          | 1.763(4)   |
| Mo(1)-O(2)           | 1.773(4)   | Mo(1)-O(5)          | 2.013(4)   |
| Mo(1)-O(4)           | 2.062(4)   | Mo(2)-O(6)          | 1.716(4)   |
| Mo(2)-O(7)           | 1.747(4)   | Mo(2)-O(8)          | 1.829(4)   |
| Mo(2)-O(4)           | 1.918(4)   | Mo(2)-O(5)          | 2.084(4)   |
| Mo(2)-Mo(3)          | 3.2047(8)  | Mo(3)-O(9)          | 1.708(4)   |
| Mo(3)-O(10)          | 1.767(4)   | Mo(3)-O(11)         | 1.768(4)   |
| Mo(3)-O(5)           | 2.066(4)   | Mo(3)-O(8)          | 2.093(4)   |
| O(11)-Cu(1)-O(3)     | 85.47(17)  | O(11)-Cu(1)-N(3)    | 85.29(19)  |
| O(3)-Cu(1)-N(3)      | 170.05(19) | O(11)-Cu(1)-N(10)#1 | 157.54(18) |
| O(3)-Cu(1)-N(10)#1   | 87.26(19)  | N(3)-Cu(1)-N(10)#1  | 100.0(2)   |
| O(11)-Cu(1)-N(1)     | 110.37(18) | O(3)-Cu(1)-N(1)     | 96.24(18)  |
| N(3)-Cu(1)-N(1)      | 90.41(19)  | N(10)#1-Cu(1)-N(1)  | 91.52(19)  |
| O(4)-Cu(2)-N(7)      | 166.4(2)   | O(4)-Cu(2)-O(10)#2  | 96.81(16)  |
| N(7)-Cu(2)-O(10)#2   | 92.25(19)  | O(4)-Cu(2)-O(2)     | 75.79(17)  |
| N(7)-Cu(2)-O(2)      | 92.7(2)    | O(10)#2-Cu(2)-O(2)  | 162.57(19) |
| O(4)-Cu(2)-N(6)#3    | 91.9(2)    | N(7)-Cu(2)-N(6)#3   | 97.3(2)    |
| O(10)#2-Cu(2)-N(6)#3 | 95.72(19)  | O(2)-Cu(2)-N(6)#3   | 100.2(2)   |
| O(1)-Mo(1)-O(3)      | 107.2(2)   | O(1)-Mo(1)-O(2)     | 106.8(2)   |
| O(3)-Mo(1)-O(2)      | 102.3(2)   | O(1)-Mo(1)-O(5)     | 104.90(19) |
| O(3)-Mo(1)-O(5)      | 90.32(17)  | O(2)-Mo(1)-O(5)     | 140.32(19) |
| O(1)-Mo(1)-O(4)      | 104.2(2)   | O(3)-Mo(1)-O(4)     | 146.82(18) |
| O(2)-Mo(1)-O(4)      | 78.37(18)  | O(5)-Mo(1)-O(4)     | 71.24(15)  |

|                   |            |                  |            |
|-------------------|------------|------------------|------------|
| O(6)-Mo(2)-O(7)   | 108.0(2)   | O(6)-Mo(2)-O(8)  | 104.0(2)   |
| O(7)-Mo(2)-O(8)   | 99.2(2)    | O(6)-Mo(2)-O(4)  | 103.8(2)   |
| O(7)-Mo(2)-O(4)   | 94.56(18)  | O(8)-Mo(2)-O(4)  | 143.24(18) |
| O(7)-Mo(2)-O(5)   | 142.98(19) | O(8)-Mo(2)-O(5)  | 75.93(16)  |
| O(4)-Mo(2)-O(5)   | 72.64(16)  | O(6)-Mo(2)-O(5)  | 108.77(18) |
| O(9)-Mo(3)-O(10)  | 103.9(2)   | O(9)-Mo(3)-O(11) | 103.1(2)   |
| O(10)-Mo(3)-O(11) | 105.76(19) | O(9)-Mo(3)-O(5)  | 101.04(19) |
| O(10)-Mo(3)-O(5)  | 146.12(17) | O(11)-Mo(3)-O(5) | 90.27(17)  |
| O(9)-Mo(3)-O(8)   | 95.3(2)    | O(10)-Mo(3)-O(8) | 84.16(17)  |
| O(11)-Mo(3)-O(8)  | 156.05(17) | O(5)-Mo(3)-O(8)  | 71.01(15)  |

\*Symmetry mode, #1 -x+2,-y+1,-z+2; #2 -x+2,-y+2,-z+2; #3 x+1,y+1,z+1.

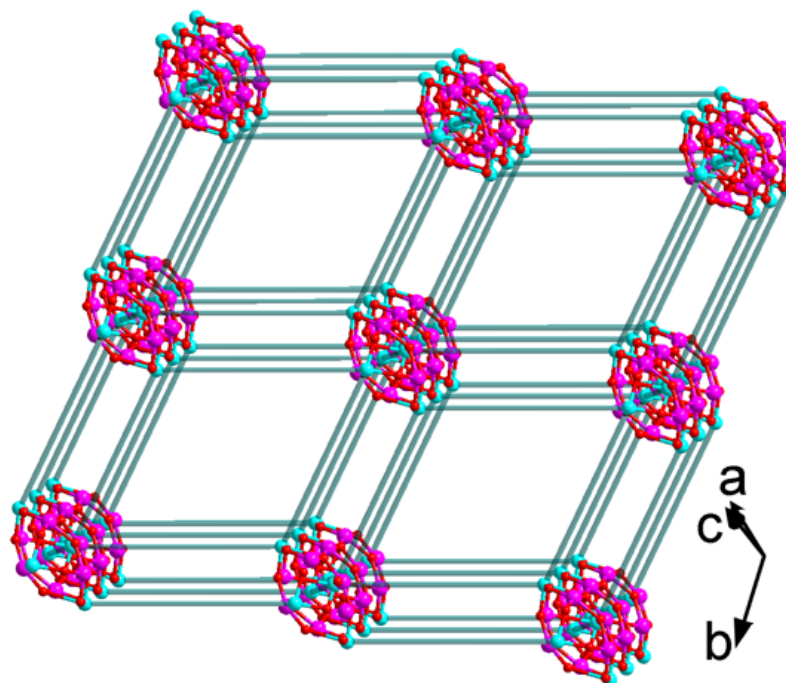

**Figure S1.** The organic-inorganic hybrid network based on the bimetallic cluster.

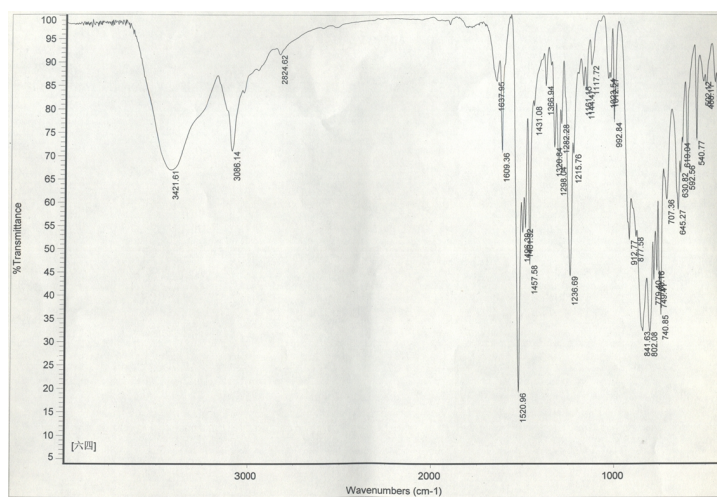

**Figure S2.** IR plot for 1.

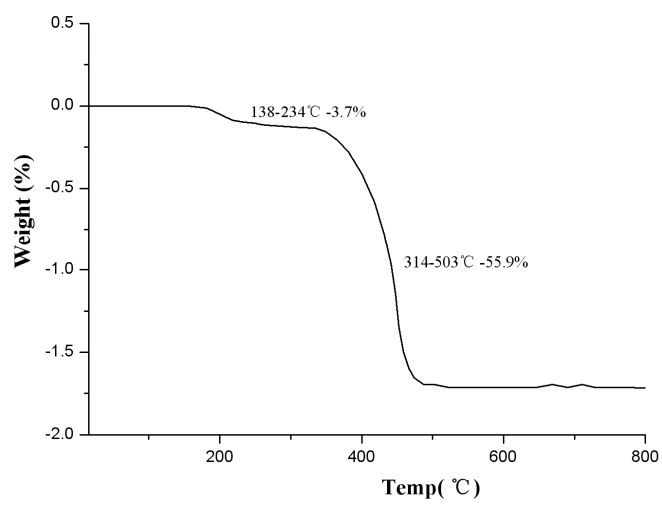

**Figure S3.** TG plot for **1** vs. temperature.

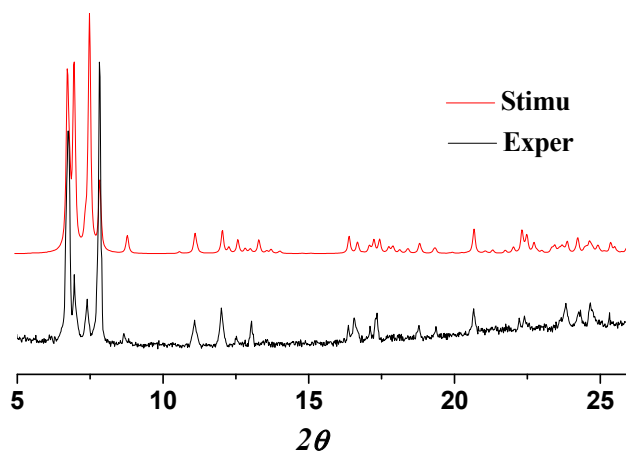

**Figure S4.** XRPD plot for **1** at room temperature.
